# Supplementary material
Source: ML conference proceedings conference paper supplement (https://openaccess.thecvf.com/content/CVPR2022/html/Zhu_Infrared_Invisible_Clothing_CVPR_2022_paper.html)
Supplement: Supplementary file 1 [file Zhu_Infrared_Invisible_Clothing_CVPR_2022_supplemental.zip]

Archive with 3 entries (3 files):
- SM Video1 Attack Demo.mp4
- SM Video2 Manufacturing Process.mp4
- 04109-supp-text.pdf
